# Supplementary material for: Identification, Antioxidant Capacity, and Matrix Metallopeptidase 9 (MMP-9) In Silico Inhibition of Haloarchaeal Carotenoids from Natronococcus sp. and Halorubrum tebenquichense
Source: MDPI journal article supplement (doi:10.3390/microorganisms11092344), 2023-09-19
Supplement: s1 [file s1]

# SUPPLEMENTARY MATERIAL

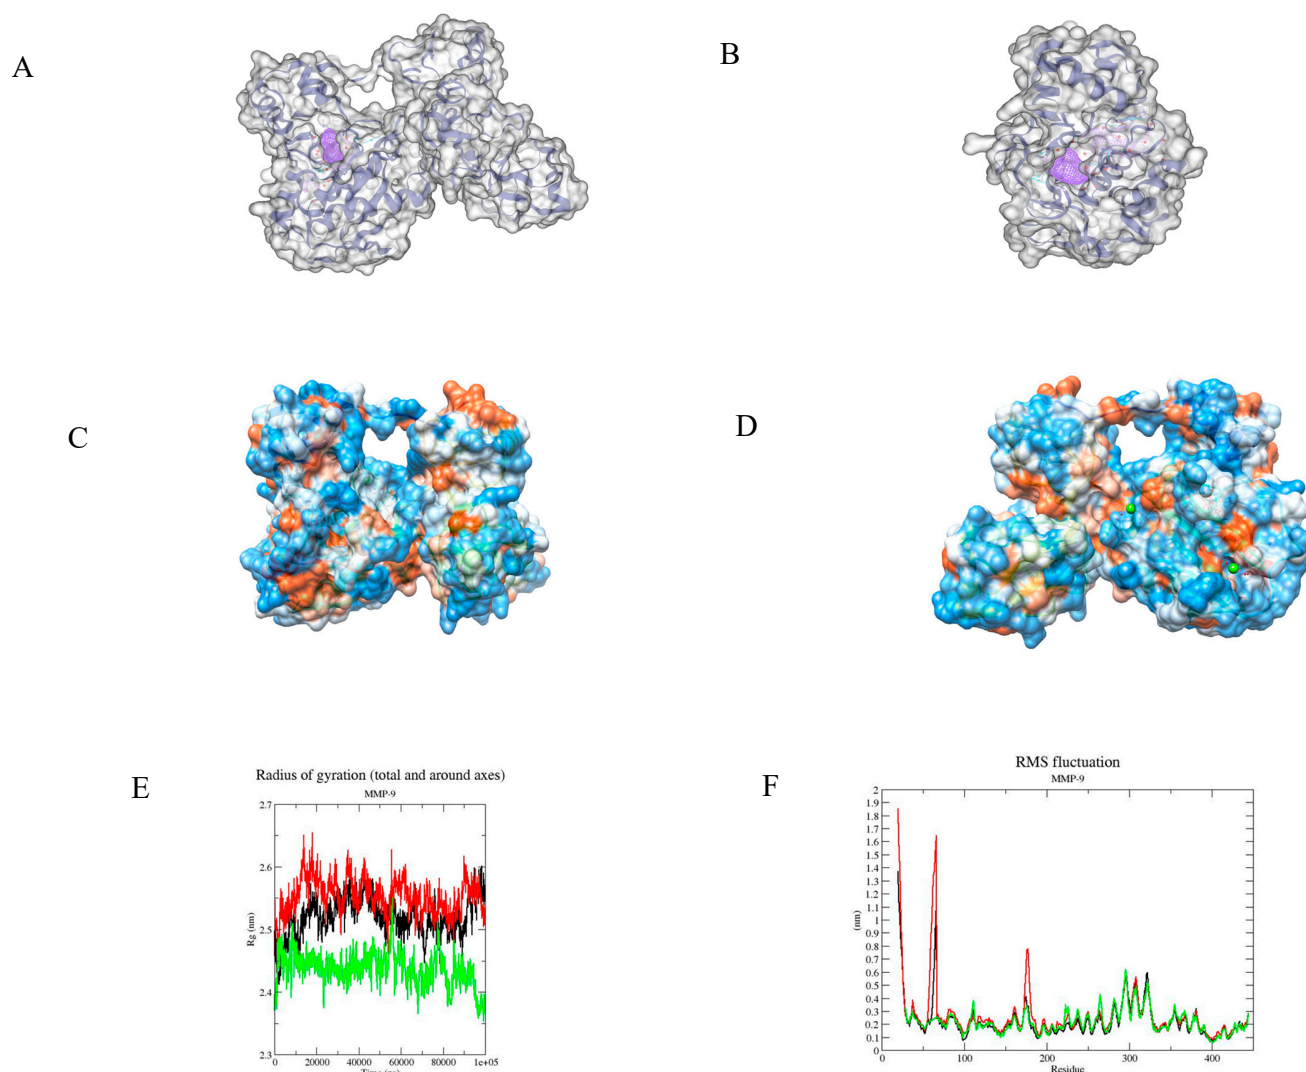

**Figure S1.-** Protein pockets calculated with Protein Plus server: (A) Binding site 1 and (B) Binding site 2.

Protein hydrophobic surface calculated with UCSF Chimera: (C) Back, Allosteric binding site region and (D) front, showing binding site 1 region. (blue=hydrophilic and orange=hydrophobic).

(E) Radius of gyration from MMP-9 calculated by molecular dynamic simulation: Binding site 1 (black), Binding site two (red) and allosteric binding site (green).

(F) RMSF of MMP-9 calculated by molecular dynamic simulation: Binding site 1 (black), Binding site two (red) and allosteric binding site (green).

**Table S1.-** Pocket properties calculated by Protein Plus server/

| <b>POCKET PROPERTIES</b>  | <b>BINDING SITE 1</b> | <b>BINDING SITE 2</b> |
|---------------------------|-----------------------|-----------------------|
| ACCEPTOR                  | 11                    | 7                     |
| DEPTH (Å)                 | 12.92                 | 6.30                  |
| DONORS                    | 5                     | 1                     |
| HYDROPHOBICITY            | 0.64                  | 0.70                  |
| SURFACE (Å <sup>2</sup> ) | 324.85                | 203.11                |
| SURFACE VOLUME RATIO      | 1.59                  | 2.31                  |
| VOLUME (Å <sup>3</sup> )  | 204.80                | 88.06                 |
